# Supplementary material for: The effect of municipality-level social media use on youth mental health
Source: Research Square preprint supplement (doi:10.21203/rs.3.rs-6647544/v1), 2025-06-06
Supplement: Supplementary file 1 [file 38bd76bf6c04a385fc2ef40e.docx]

Survey items used in the paper The Effect of Municipality-Level Social Media Use on Youth Mental Health.

Social media

| Item | Response options |
| --- | --- |
| **Think about what you do on a normal day. How much time do you spend on the following things:** | 1: No time  2: Less than 30 minutes  3: 30 minutes – 1 hour  4: 1-2 hours  5: 2-3 hours  6: More than 3 hours |
| Watching TV |
| Reading books (not school-related) |
| Watching films/TV series/YouTube |
| Playing computer games/video games |
| Playing games on your mobile/tablet |
| **Social media (Facebook, Instagram, etc.)** |

Depressive symptoms

Items were adapted from the Depressive Mood Inventory(1)

| Item | Response options |
| --- | --- |
| **During the past week, have you been affected by any of the following issues:** | 1: Not been affected at all  2: Not been affected much  3: Been affected quite a lot  4: Been affected a great deal |
| Felt that everything is a struggle |
| Had sleep problems |
| Felt unhappy, sad or depressed |
| Felt hopelessness about the future |
| Felt stiff or tense |
| Worried too much about things |

Anxiety symptoms

Items were adapted from the Hopkins Symptom Checklist(2)

| Item | Response options |
| --- | --- |
| **During the past week, have you been affected by any of the following issues:** | 1: Not been affected at all  2: Not been affected much  3: Been affected quite a lot  4: Been affected a great deal |
| Suddenly felt scared for no reason |
| Felt constant fear or anxiety |
| Been nervous or felt uneasy |

References

1. Kandel DB, Davies M. Epidemiology of depressive mood in adolescents: An empirical study. Archives of General Psychiatry. 1982;39(10):1205-12.

2. Derogatis LR, Lipman RS, Rickels K, Uhlenhuth EH, Covi L. The Hopkins Symptom Checklist (HSCL): A self‐report symptom inventory. Behavioral Science. 1974;19(1):1-15.

The complete Ungdata survey can be found at <https://www.ungdata.no/wp-content/uploads/2020/09/Ungdata-Dokumentasjonsrapport-2010-2019-PDF-1.pdf>.
